# Supplementary material for: Integrated proteomic and transcriptomic analysis of the Aedes aegypti eggshell
Source: PubMed Central journal article supplement (PMC4234484; doi:10.1186/1471-213x-14-15), 2014-04-05

**Additional file 6.** Sequence and hydrophobicity conservation among *Aedes aegypti* vitelline membrane proteins. A) Full length protein sequences were submitted to MEME <http://meme.nbcr.net/meme/cgi-bin/meme.cgi> and a conserved motif 30 amino acids in length was discovered. B) Multiple alignment of the sequence motif constructed at PRALINE <http://www.ibi.vu.nl/programs/pralinewww/> provides additional support for the conservation. C) The hydrophobicity patterns of the six vitelline membrane proteins were predicted at <http://web.expasy.org/cgi-bin/protscale/protscale.pl> using the Hphob. / Kyte & Doolittle option. Bars were inserted in the graphs to indicate the positions of the conserved motif displayed in A and B.

**A**

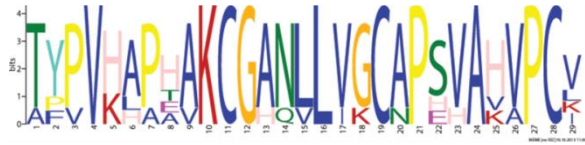

**B**

Unconserved 0 1 2 3 4 5 6 7 8 9 10 Conserved

|             | 1 | 2 | 3 | 4 | 5 | 6 | 7 | 8 | 9 | 10 | 11 | 12 | 13 | 14 | 15 | 16 | 17 | 18 | 19 | 20 | 21 | 22 | 23 | 24 | 25 | 26 | 27 | 28 | 29 | 30 |
|-------------|---|---|---|---|---|---|---|---|---|----|----|----|----|----|----|----|----|----|----|----|----|----|----|----|----|----|----|----|----|----|
| AAEL013027  | T | Y | P | - | V | H | A | P | H | A  | K  | C  | G  | A  | N  | L  | L  | V  | G  | C  | A  | P  | S  | V  | A  | H  | V  | P  | C  | V  |
| AAEL006670  | T | Y | P | - | V | H | A | P | H | A  | K  | C  | G  | A  | N  | L  | L  | V  | G  | C  | A  | P  | S  | V  | A  | H  | V  | P  | C  | L  |
| AAEL014561  | T | Y | P | - | V | H | A | P | H | A  | K  | C  | G  | A  | N  | L  | L  | V  | G  | C  | A  | P  | S  | V  | A  | H  | A  | P  | C  | V  |
| AAEL017403  | T | Y | P | - | V | K | A | P | A | A  | K  | C  | G  | A  | N  | L  | L  | V  | G  | C  | A  | P  | S  | V  | A  | H  | V  | P  | C  | V  |
| AAEL017501  | A | P | V | V | H | H | A | T | A | K  | C  | G  | A  | N  | V  | L  | V  | G  | C  | A  | P  | E  | V  | A  | K  | V  | P  | C  | I  |    |
| AAEL017471  | T | F | P | - | V | K | L | P | E | V  | K  | C  | G  | H  | Q  | L  | L  | I  | K  | C  | N  | P  | H  | H  | A  | V  | V  | P  | C  | K  |
| Consistency | 6 | 6 | 0 | * | 6 | 5 | 7 | 4 | 8 | *  | *  | *  | *  | 7  | 8  | 8  | *9 | 7  | *  | 7  | 6  | 7  | 5  | 8  | *  | *  | 6  |    |    |    |

**C**

AAEL017403 (15a2)

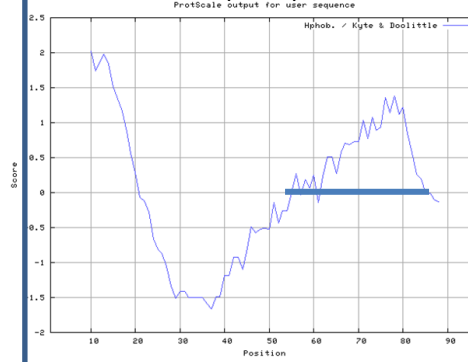

AAEL014561 (15a3)

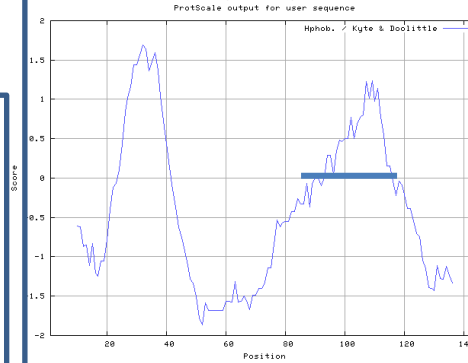

AAEL013027 (15a1)

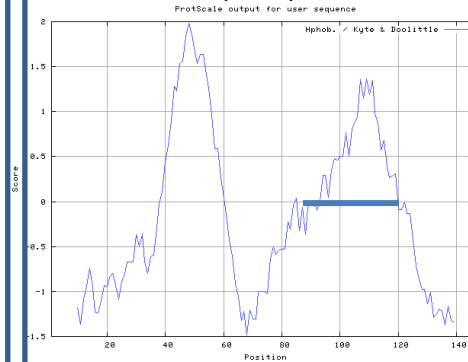

AAEL017501

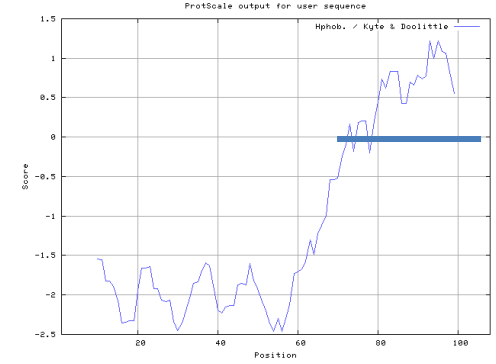

AAEL006670

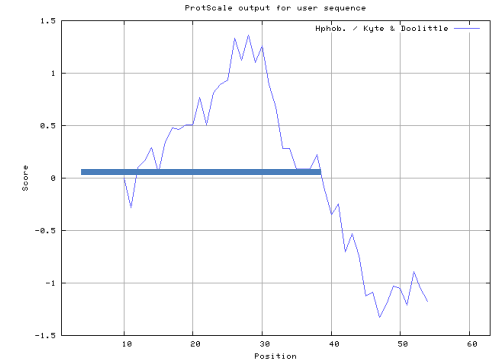

AAEL017471

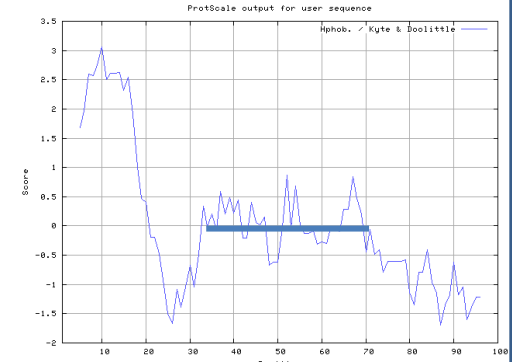

Supplement: 1471-213X-14-15-S6.pdf [file 1471-213X-14-15-S6.pdf]
