# Supplementary material for: Integrated proteomic and transcriptomic analysis of the Aedes aegypti eggshell
Source: PubMed Central journal article supplement (PMC4234484; doi:10.1186/1471-213x-14-15), 2014-04-05

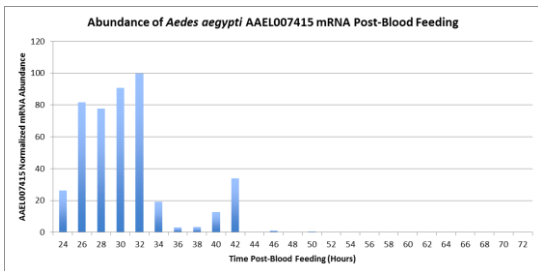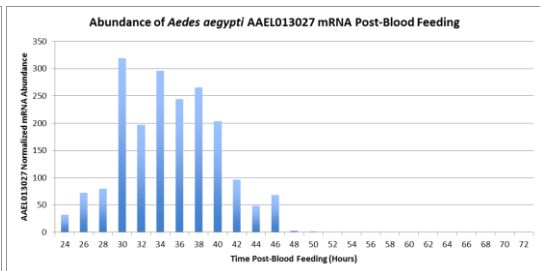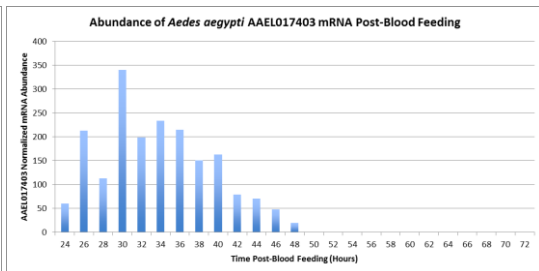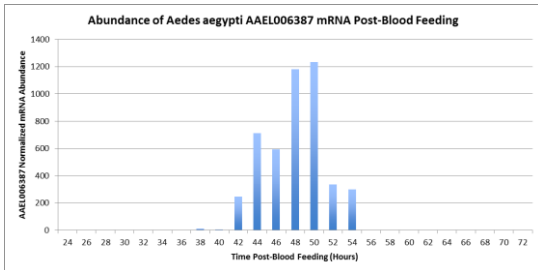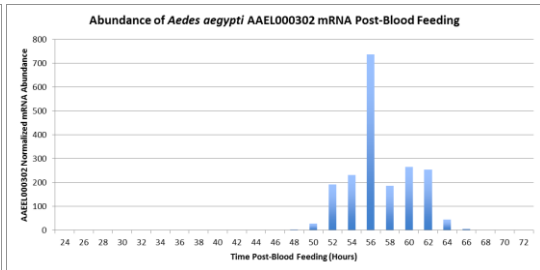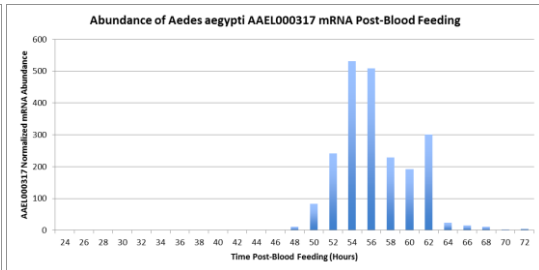

Supplement: 1471-213X-14-15-S5.pdf [file 1471-213X-14-15-S5.pdf]
