# Supplementary material for: Integrated proteomic and transcriptomic analysis of the Aedes aegypti eggshell
Source: PubMed Central journal article supplement (PMC4234484; doi:10.1186/1471-213x-14-15), 2014-04-05
Supplement: 1471-213X-14-15-S7.pdf [file 1471-213X-14-15-S7.pdf]

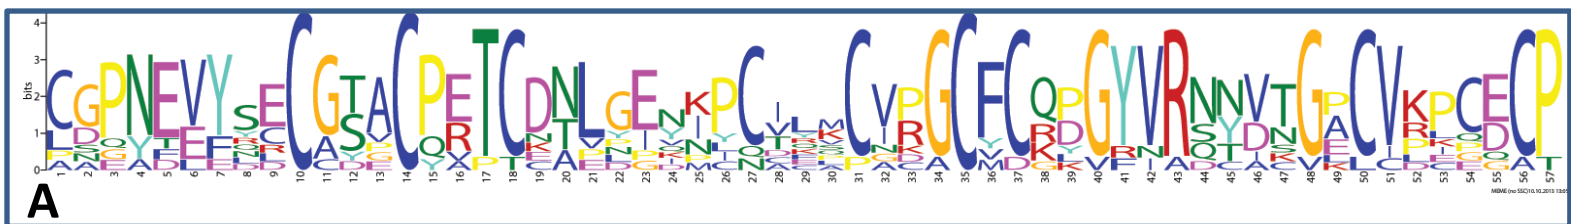

Unconserved 0 1 2 3 4 5 6 7 8 9 10 Conserved

|             | 1  | 2 | 3 | 4 | 5 | 6 | 7 | 8 | 9 | 10 | 11 | 12 | 13 | 14 | 15 | 16 | 17 | 18 | 19 | 20 | 21 | 22 | 23 | 24 | 25 | 26 | 27 | 28 | 29 | 30 | 31 | 32 | 33 | 34 | 35 | 36 | 37 | 38 | 39 | 40 | 41 | 42 | 43 | 44 | 45 | 46 | 47 | 48 | 49 | 50 |
|-------------|----|---|---|---|---|---|---|---|---|----|----|----|----|----|----|----|----|----|----|----|----|----|----|----|----|----|----|----|----|----|----|----|----|----|----|----|----|----|----|----|----|----|----|----|----|----|----|----|----|----|
| AAEL000369  | CG | P | N | E | V | Y | S | E | G | T  | A  | C  | P  | E  | T  | C  | D  | N  | L  | G  | E  | N  | I  | P  | C  | V  | L  | M  | C  | V  | P  | G  | C  | F  | C  | Q  | P  | G  | V  | R  | N  | N  | V  | T  | G  |    |    |    |    |    |
| AAEL000333  | CG | P | N | E | E | Y | S | E | G | T  | A  | C  | P  | E  | T  | C  | D  | T  | L  | G  | E  | I  | K  | P  | C  | I  | L  | L  | C  | V  | R  | G  | C  | F  | C  | Q  | P  | G  | V  | R  | N  | N  | V  | T  | G  |    |    |    |    |    |
| AAEL000302  | CG | P | N | D | L | Y | L | E | G | S  | A  | C  | P  | E  | T  | C  | D  | T  | L  | G  | E  | V  | K  | P  | C  | T  | R  | Q  | C  | I  | R  | G  | C  | F  | C  | Q  | L  | G  | V  | R  | N  | T  | V  | T  | G  |    |    |    |    |    |
| AAEL000317  | CG | P | N | E | V | Y | S | E | G | T  | A  | C  | P  | E  | T  | C  | D  | N  | L  | G  | E  | N  | I  | P  | C  | V  | L  | M  | C  | V  | P  | G  | C  | F  | C  | Q  | P  | G  | V  | R  | N  | N  | V  | T  | G  |    |    |    |    |    |
| AAEL000361  | CA | E | E | V | Y | S | E | G | S | A  | C  | P  | F  | V  | T  | C  | D  | T  | L  | G  | E  | D  | K  | P  | C  | D  | Y  | P  | C  | I  | R  | G  | C  | F  | C  | Q  | P  | G  | V  | R  | N  | T  | A  | T  | G  |    |    |    |    |    |
| AAEL000363  | AD | P | N | E | V | Y | D | C | G | S  | A  | C  | P  | Q  | R  | T  | C  | N  | N  | E  | L  | I  | Y  | I  | L  | C  | I  | K  | K  | C  | V  | P  | G  | C  | F  | C  | R  | D  | G  | V  | R  | Q  | Y  | D  | N  | G  |    |    |    |    |
| AAEL000375  | LD | P | N | T | E | F | R | L | G | D  | E  | C  | P  | F  | R  | T  | C  | E  | N  | L  | D  | P  | K  | P  | P  | C  | T  | Q  | V  | C  | A  | R  | G  | C  | Y  | C  | K  | K  | G  | F  | V  | R  | D  | N  | I  | S  | G  |    |    |    |
| AAEL005090  | PN | P | N | E | V | Y | N | C | G | T  | P  | C  | P  | Q  | R  | T  | C  | K  | N  | L  | N  | I  | Y  | M  | Y  | C  | I  | E  | K  | C  | V  | P  | G  | C  | F  | C  | R  | D  | G  | V  | R  | Q  | Y  | D  | N  | G  |    |    |    |    |
| AAEL005487  | CS | G | A | F | E | E | - | R | C | Y  | G  | C  | Y  | E  | P  | T  | C  | A  | V  | P  | E  | Q  | N  | I  | Q  | -  | F  | A  | C  | N  | D  | G  | C  | V  | C  | K  | D  | G  | Y  | I  | R  | S  | C  | D  | K  | G  |    |    |    |    |
| AAEL005098  | L  | Q | Y | E | V | F | Q | D | C | A  | S  | V  | C  | P  | A  | T  | C  | D  | A  | P  | Y  | G  | N  | -  | N  | C  | A  | S  | P  | G  | C  | A  | C  | M  | D  | G  | V  | R  | N  | -  | A  | S  | Y  |    |    |    |    |    |    |    |
| Consistency | 4  | 4 | 0 | 6 | 5 | 8 | 5 | 8 | 3 | 4  | *  | 0  | 6  | 5  | 5  | *  | 0  | 6  | 4  | *  | *  |    |    |    |    |    |    |    |    |    |    |    |    |    |    |    |    |    |    |    |    |    |    |    |    |    |    |    |    |    |

|            | 61 | 62 | 63 | 64 | 65 | 66 | 67 | 68 | 69 | 70 |
|------------|----|----|----|----|----|----|----|----|----|----|
| AAEL000369 | A  | C  | V  | K  | P  | C  | E  | C  | E  | F  |
| AAEL000333 | A  | C  | V  | K  | P  | C  | E  | C  | E  | F  |
| AAEL000302 | E  | C  | V  | K  | P  | C  | D  | C  | E  | F  |
| AAEL000317 | A  | C  | V  | K  | P  | C  | E  | C  | E  | F  |
| AAEL000361 | E  | C  | V  | R  | E  | C  | D  | C  | E  | F  |
| AAEL000363 | P  | C  | V  | R  | L  | E  | E  | C  | E  | F  |
| AAEL000375 | L  | C  | V  | L  | P  | C  | D  | C  | E  | F  |
| AAEL005090 | P  | C  | V  | P  | I  | G  | E  | C  | E  | F  |
| AAEL005487 | P  | C  | I  | P  | K  | Q  | C  | E  | F  |    |
| AAEL005098 | V  | C  | V  | R  | L  | C  | D  | C  | E  | F  |

**B**

**Additional file 7.** Sequence and hydrophobicity conservation among *Aedes aegypti* eggshell cysteine-rich proteins. A) Full length protein sequences were submitted to MEME <http://meme.nbcr.net/meme/cgi-bin/meme.cgi> and a conserved motif 50 amino acids in length was discovered. B) Multiple alignment of the sequence motif constructed at PRALINE <http://www.ibi.vu.nl/programs/pralinewww/> supports the conservation. C) The hydrophobicity patterns of the cysteine-rich proteins were predicted at <http://web.expasy.org/cgi-bin/protscale/protscale.pl> using the Hphob. / Kyte & Doolittle option. Bars were inserted in the graphs to indicate the positions of the conserved motif displayed in A and B.

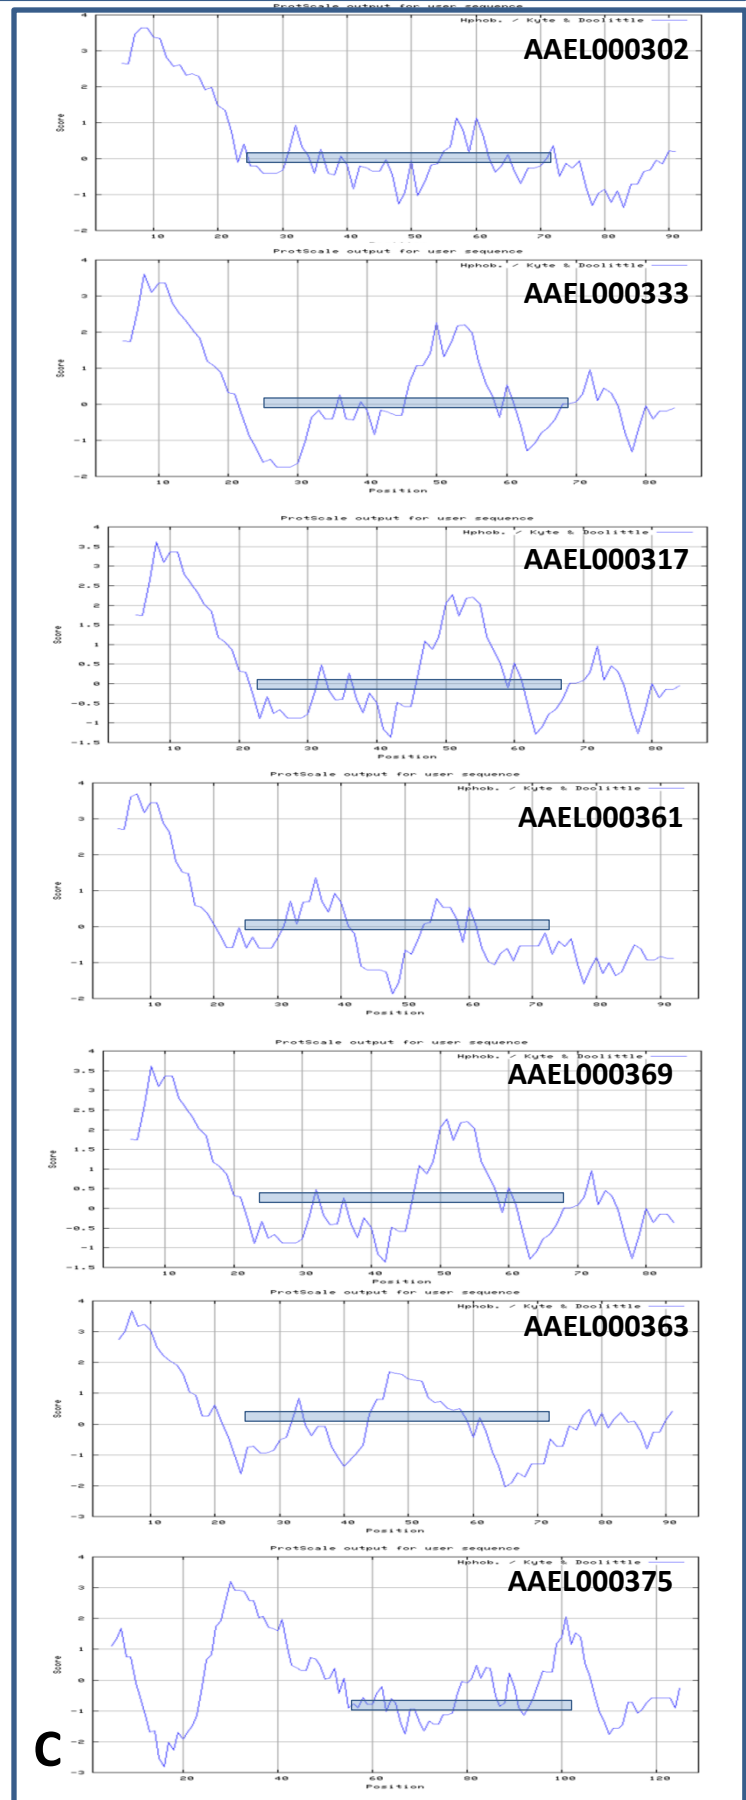

**C**
