# Supplementary material for: Integrated proteomic and transcriptomic analysis of the Aedes aegypti eggshell
Source: PubMed Central journal article supplement (PMC4234484; doi:10.1186/1471-213x-14-15), 2014-04-05
Supplement: 1471-213X-14-15-S8.pdf [file 1471-213X-14-15-S8.pdf]

**Additional file 8.** Oligonucleotide primer sequences used in quantitative RT-PCRs and for the generation of probes for hybridizations *in situ* (q and h suffixes, respectively).

| <b>Primer ID</b> | <b>Sequence 5'-3'</b>   |
|------------------|-------------------------|
| AAEL017403Fq     | ACCCCGTTGTCCACACATAC    |
| AAEL017403Rq     | AGCGCATCCTACCAGAAGGT    |
| AAEL013027Fq     | GTCCCACTTGAAGGCTCTTG    |
| AAEL000302Rq     | TCCAGTCACGGTATTGCGTA    |
| AAEL000302Fq     | TACGCAATACCGTGACTIONGGA |
| AAEL000302Rq     | CACTGGCGTTGTTGTAGTGG    |
| AAEL000317Fq     | CGGAATGTGGAACAGCTTG     |
| AAEL000317Rq     | CGTACGTAACCTGGCTGACA    |
| AAEL007415Fq     | GCTTCCAGTGCAAGTCAACA    |
| AAEL007415Rq     | GTATGGACCACGGGCATATC    |
| AAEL006387Fq     | TCAGGGAGTCTTCCCAGATG    |
| AAEL006387Rq     | CCGTCTAGAGTCCTTCAGC     |
| RP49Fq           | ACAAGCTTGCCCCCAACT      |
| RP49Rq           | CCGTAACCGATGTTTGGC      |
| AAEL006387-Rh    | GCCAGGAATTGGATGAGTGT    |
| AAEL006387-Fh    | CCGTCTAGAGTCCTTCAGC     |
| AAEL006396-Fh    | GCTTCCGACAACAGTTGGAT    |
| AAEL006396-Rh    | AAGCAGCGCCATCATAAAGT    |
| AAEL007112-Fh    | CCAACCTCTCCAACCACATT    |
| AAEL007112-Rh    | TCAACCGTGGTTTCTTCCTC    |
| AAEL010714-Fh    | ACAAGTTACGCCGAAGCACT    |
| AAEL010714-Rh    | ACAGCTGTCAAGCGATTCT     |
